# Supplementary material for: Impacts of Utensil Conditions on Consumer Perception and Acceptance of Food Samples Evaluated under In-Home Testing during the COVID-19 Pandemic
Source: MDPI journal article supplement (doi:10.3390/foods12050914), 2023-02-21
Supplement: s1 [file s1]

### **Instruction prior to participating in the study:**

Note: We ask that you refrain from smoking, eating, and drinking for 2 hours prior to your participation; drinking water is allowed. Did you refrain from smoking, eating, and drinking (except water) for 2 hours? If not yet, please try it later. Please note that you are required to cook and evaluate the ramen noodles alone, and away from any distractions. If you are ready to begin cooking, please press the button below.

### **Cooking directions:**

1. Please practice caution while preparing this sample.
2. Boil 2 cups of water in a saucepan.
3. Add noodles, breaking up if desired.
4. Cook for 3 minutes (or until noodles are tender), stirring occasionally.
5. Remove from heat, add flavor packet (to the noodles and broth), stir well for 1 minute until flavoring is fully dissolved.
6. Please do not add any other ingredients into the noodles and broth.
7. Pour all the noodles and broth into a ~ 16 oz bowl of your liking. Because the noodles and broth are VERY HOT, please be careful.
8. PLEASE don't eat the sample yet. Click next once you are ready for evaluation.

Q1) Please select the cooking medium used for this study.

- ☐ Microwave
- ☐ Stove top
- ☐ Induction cooker
- ☐ Other

Q2) Please mention if ingredients other than noodle, water, and seasoning packet were used to prepare this sample. Please write N/A if nothing else was added.

Have you finished cooking the sample? If yes, please click “next”.

If not, please finish cooking the sample and then press “next”.



### ***Sensory attribute intensity***

Please rate your impression of the INTENSITY of OVERALL FLAVOR of the sample.

|                          |                          |                          |                          |                          |                          |                          |                          |                          |
|--------------------------|--------------------------|--------------------------|--------------------------|--------------------------|--------------------------|--------------------------|--------------------------|--------------------------|
| Extremely Weak           | Very Weak                | Moderately Weak          | Slightly Weak            | Neither Weak nor Strong  | Slightly Strong          | Moderately Strong        | Very Strong              | Extremely Strong         |
| <input type="checkbox"/> |

Please rate your impression of the INTENSITY of CHICKEN FLAVOR of the sample.

|                          |                          |                          |                          |                          |                          |                          |                          |                          |
|--------------------------|--------------------------|--------------------------|--------------------------|--------------------------|--------------------------|--------------------------|--------------------------|--------------------------|
| Extremely Weak           | Very Weak                | Moderately Weak          | Slightly Weak            | Neither Weak nor Strong  | Slightly Strong          | Moderately Strong        | Very Strong              | Extremely Strong         |
| <input type="checkbox"/> |

Please rate your impression of the INTENSITY of SALTINESS of the sample.

|                          |                          |                          |                          |                          |                          |                          |                          |                          |
|--------------------------|--------------------------|--------------------------|--------------------------|--------------------------|--------------------------|--------------------------|--------------------------|--------------------------|
| Extremely Weak           | Very Weak                | Moderately Weak          | Slightly Weak            | Neither Weak nor Strong  | Slightly Strong          | Moderately Strong        | Very Strong              | Extremely Strong         |
| <input type="checkbox"/> |

### ***Want to eat again***

Please rate how much you WANT to eat this sample again.

|                          |                          |                          |                          |                             |                          |                          |                          |                          |
|--------------------------|--------------------------|--------------------------|--------------------------|-----------------------------|--------------------------|--------------------------|--------------------------|--------------------------|
| Extremely Unwanted       | Very Unwanted            | Moderately Unwanted      | Slightly Unwanted        | Neither Unwanted Nor Wanted | Slightly Wanted          | Moderately Wanted        | Very Wanted              | Extremely Wanted         |
| <input type="checkbox"/>    | <input type="checkbox"/> | <input type="checkbox"/> | <input type="checkbox"/> | <input type="checkbox"/> |

### ***Amount of sample consumption***

Please select approximately the AMOUT of sample you ate.

|                          |       |
|--------------------------|-------|
| <input type="checkbox"/> | 100%  |
| <input type="checkbox"/> | 75%   |
| <input type="checkbox"/> | 50%   |
| <input type="checkbox"/> | 25%   |
| <input type="checkbox"/> | < 25% |

### *Extrinsic factors*

Please describe the COLOR of the FORK/SPOON you are using to evaluate this sample.

Please describe the MATERIAL (e.g., plastic, stainless steel, etc.) of the FORK/SPOON you are using to evaluate this sample.

Please rate your LIKING of the FORK/SPOON used in this study.

|                          |                          |                          |                          |                             |                          |                          |                          |                          |
|--------------------------|--------------------------|--------------------------|--------------------------|-----------------------------|--------------------------|--------------------------|--------------------------|--------------------------|
| Dislike<br>Extremely     | Dislike<br>Very Much     | Dislike<br>Moderately    | Dislike<br>Slightly      | Neither Like<br>nor Dislike | Like<br>Slightly         | Like<br>Moderately       | Like<br>Very Much        | Like<br>Extremely        |
| <input type="checkbox"/>    | <input type="checkbox"/> | <input type="checkbox"/> | <input type="checkbox"/> | <input type="checkbox"/> |

Please describe the COLOR of the BOWL in which you served the ramen noodles for this evaluation.

Please describe the MATERIAL (e.g., plastic, stainless steel, etc.) of the BOWL in which you served the ramen noodles for this evaluation.

Please rate your LIKING of the BOWL used in this study.

|                          |                          |                          |                          |                             |                          |                          |                          |                          |
|--------------------------|--------------------------|--------------------------|--------------------------|-----------------------------|--------------------------|--------------------------|--------------------------|--------------------------|
| Dislike<br>Extremely     | Dislike<br>Very Much     | Dislike<br>Moderately    | Dislike<br>Slightly      | Neither Like<br>nor Dislike | Like<br>Slightly         | Like<br>Moderately       | Like<br>Very Much        | Like<br>Extremely        |
| <input type="checkbox"/>    | <input type="checkbox"/> | <input type="checkbox"/> | <input type="checkbox"/> | <input type="checkbox"/> |

Please rate your LIKING of the EATING ENVIRONMENT of the evaluation of this sample.

|                          |                          |                          |                          |                             |                          |                          |                          |                          |
|--------------------------|--------------------------|--------------------------|--------------------------|-----------------------------|--------------------------|--------------------------|--------------------------|--------------------------|
| Dislike<br>Extremely     | Dislike<br>Very Much     | Dislike<br>Moderately    | Dislike<br>Slightly      | Neither Like<br>nor Dislike | Like<br>Slightly         | Like<br>Moderately       | Like<br>Very Much        | Like<br>Extremely        |
| <input type="checkbox"/>    | <input type="checkbox"/> | <input type="checkbox"/> | <input type="checkbox"/> | <input type="checkbox"/> |

Please rate your DISTRACTING or ATTENTIVE was this environment for the evaluation of this sample.

|                          |                          |                           |                          |                                         |                          |                          |                          |                          |
|--------------------------|--------------------------|---------------------------|--------------------------|-----------------------------------------|--------------------------|--------------------------|--------------------------|--------------------------|
| Extremely<br>Distracting | Very<br>Distracting      | Moderately<br>Distracting | Slightly<br>Distracting  | Neither<br>Distracting<br>Nor Attentive | Slightly<br>Attentive    | Moderately<br>Attentive  | Very<br>Attentive        | Extremely<br>Attentive   |
| <input type="checkbox"/> | <input type="checkbox"/> | <input type="checkbox"/>  | <input type="checkbox"/> | <input type="checkbox"/>                | <input type="checkbox"/> | <input type="checkbox"/> | <input type="checkbox"/> | <input type="checkbox"/> |

Did you consume this sample with anyone (for e.g., talking with family/friend, etc.)?

- ☐ Yes
- ☐ No
